# Supplementary material for: Landfast sea ice in Hudson Bay and James Bay
Source: Oxford University Press journal article supplement (doi:10.1525/elementa.2021.00073), 2022-01-01
Supplement: si_gupta_etal_2021_hudson_bay_and_james_bay.docx [file si_gupta_etal_2021_hudson_bay_and_james_bay.docx]

**Supplementary materials**

Landfast sea ice in Hudson Bay and James Bay: Annual cycle, variability and trends, 2000–2019

*Kaushik Gupta1*, Anirban Mukhopadhyay1, David G. Babb1, David G. Barber1 and Jens K. Ehn1*

*1 - CEOS, University of Manitoba, Winnipeg, Manitoba, Canada.*

*<*email- guptak1@myumanitoba.ca>*

**Figure S1. Perpendicular transects originating from points at 100 km intervals.**

**Figure S2. Cumulated annual fast-ice extent across the Hudson Bay and James Bay region.** The color-coded lines represent the seaward edge of the annual maximum fast ice cover, for all the 19 ice seasons. For a better understanding the figure is represented in six segments highlighting the different subdivisions considered for the study. Each section represents the divisions earlier presented in Figure 1. (A – Northern Hudson Bay; B – North-western Hudson Bay; C – South-western Hudson Bay; D- Southern Hudson Bay; E – Western and Eastern James Bay; F – Northeastern and Southeastern Hudson Bay).

**Figure S3.** **A representation of the stages of fast-ice cycle showed using MODIS imagery.**

**Figure S4.** **Gradual warming and cooling pattern of air temperature across the study area**. This map shows the monthly mean air temperature over the Hudson Bay and James Bay region. Through this figure we get an idea of the warming and cooling patterns over the bay area. January and February are the coldest months with temperatures falling to -33°C in the northern part of Hudson Bay and -25°C in southern James Bay. Gradual warming starts from the southern part of James Bay and commences further north. Reversibly, gradual cooling starts from the northwestern part of Hudson Bay and progresses southwards.

**Figure S5.** **Air temperature change across the study area over the 2000-2019 study period**. Trend of changing air temperature during the ice season (November to July) for the 2000-2019 study period over Hudson Bay and James Bay obtained from MERRA-2 reanalysis.

**Figure S6.** **Mean fast ice edge at 15 selected coastal communities/locations.**

**Table S1. Freeze-up days (in day of the year), recorded at 15 selected study locations from the years 2000–2018.**

**Table S2. Fall transition days, signifying the transition day when temperatures went from above 0°C to a continues negative (below 0°C), recorded at 15 selected study locations from the years 2000–2018.**

**Table S3. Break-up days (in day of the year), recorded at 15 selected study locations from the years 2001–2019.**

**Table S4. Spring transition days, signifying the transition day when temperatures went from below 0°C to a continues positive (above 0°C), recorded at 15 selected study locations from the year 2001 to year 2019.**

**Table S5. Distance of the mean fast-ice edge from the coastline at every 100 km of the coastal stretch (starting from Ivujivik and ending at north of Chesterfield Inlet).**


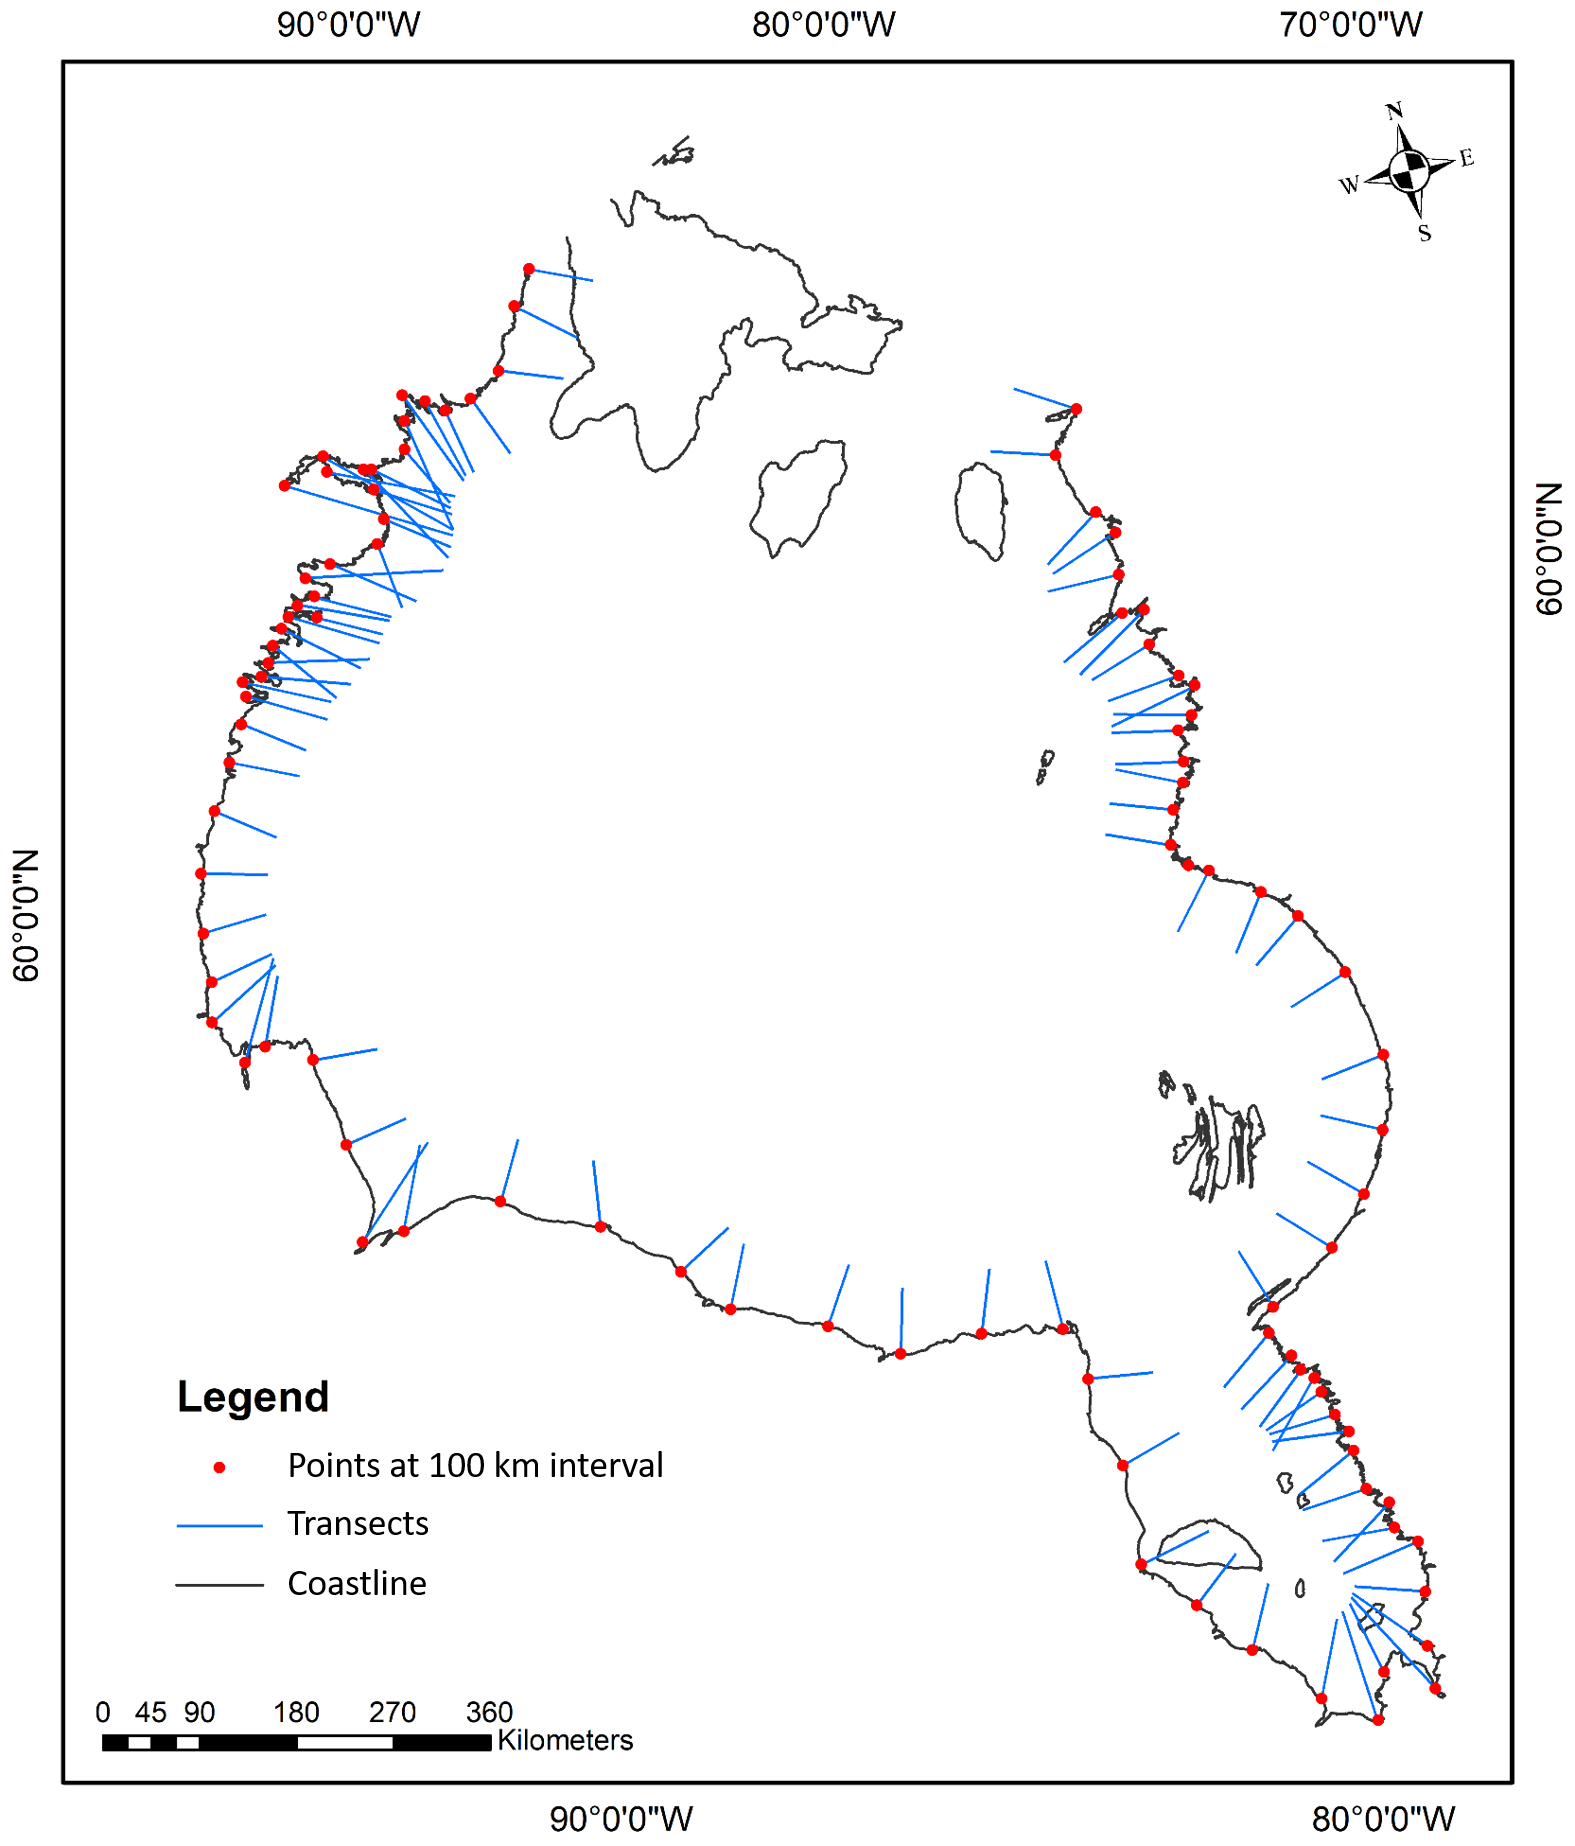


**Figure S1. Perpendicular transects originating from points at 100-km intervals.**


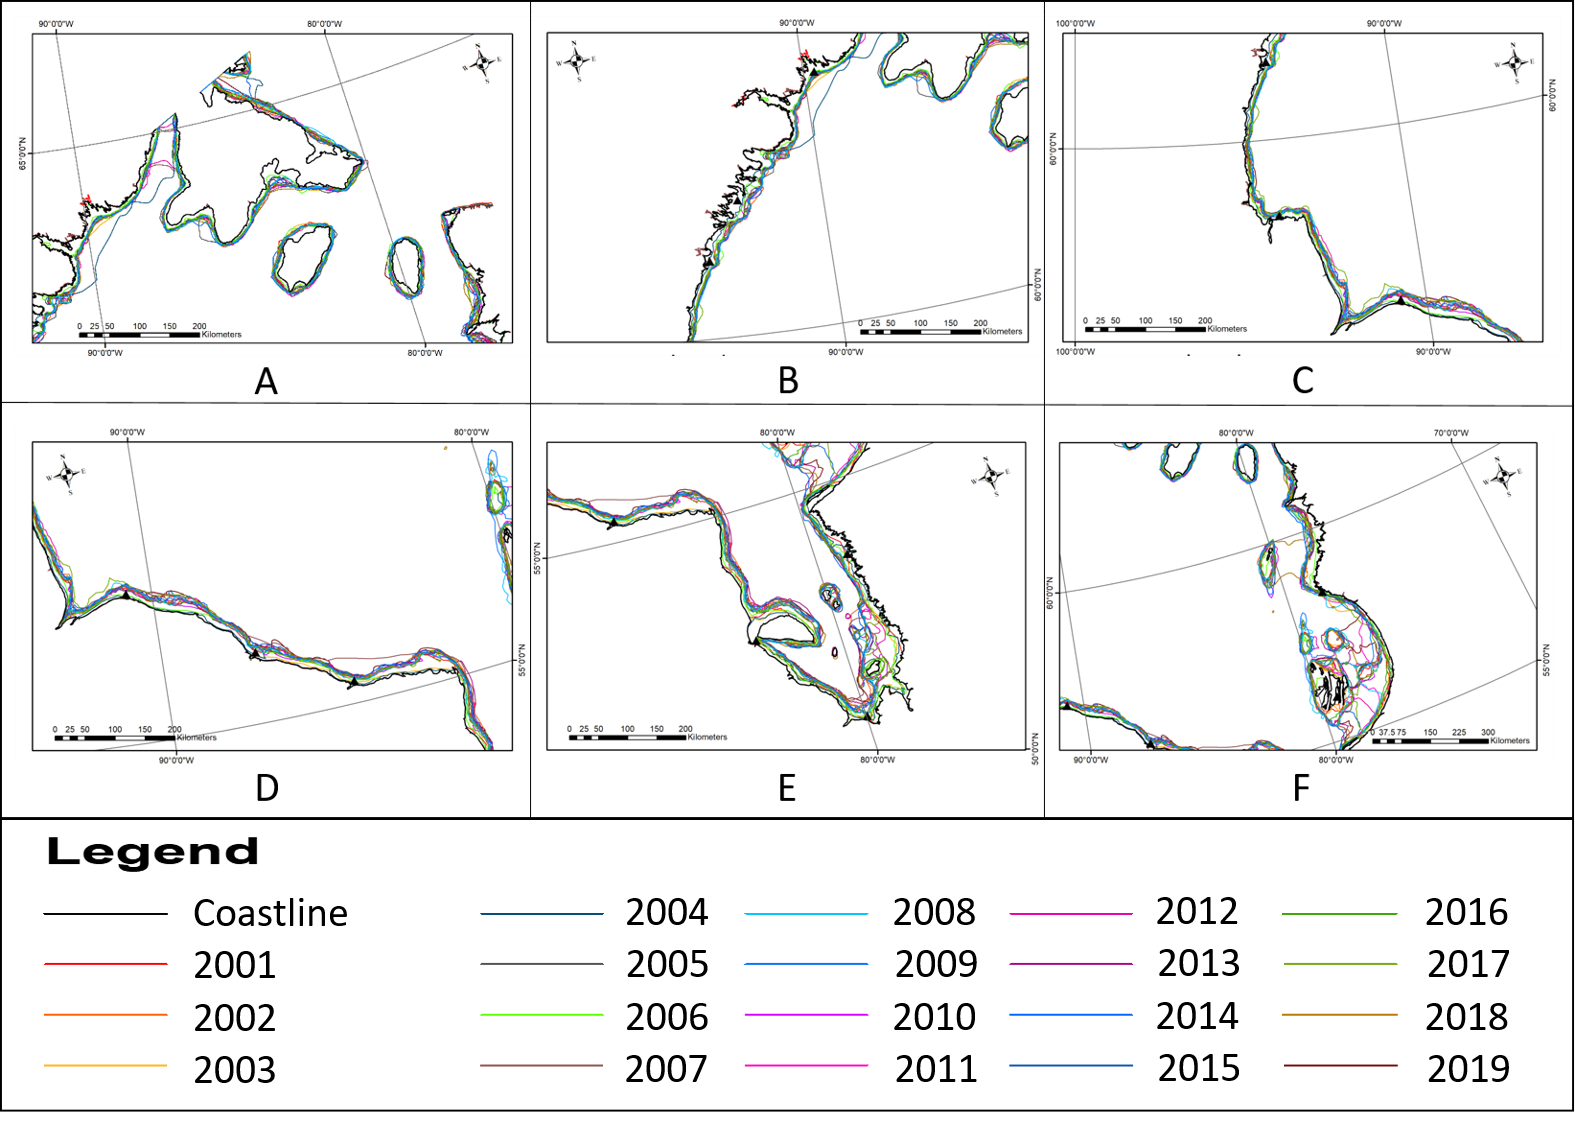


**Figure S2. Cumulated annual fast-ice extent across the Hudson Bay and James Bay region.** The color-coded lines represent the seaward edge of the annual maximum fast ice cover, for all the 19 ice seasons. For a better understanding the figure is represented in six segments highlighting the different subdivisions considered for the study. Each section represents the divisions earlier presented in Figure 1. (A – Northern Hudson Bay; B – North-western Hudson Bay; C – South-western Hudson Bay; D- Southern Hudson Bay; E – Western and Eastern James Bay; F – Northeastern and Southeastern Hudson Bay).


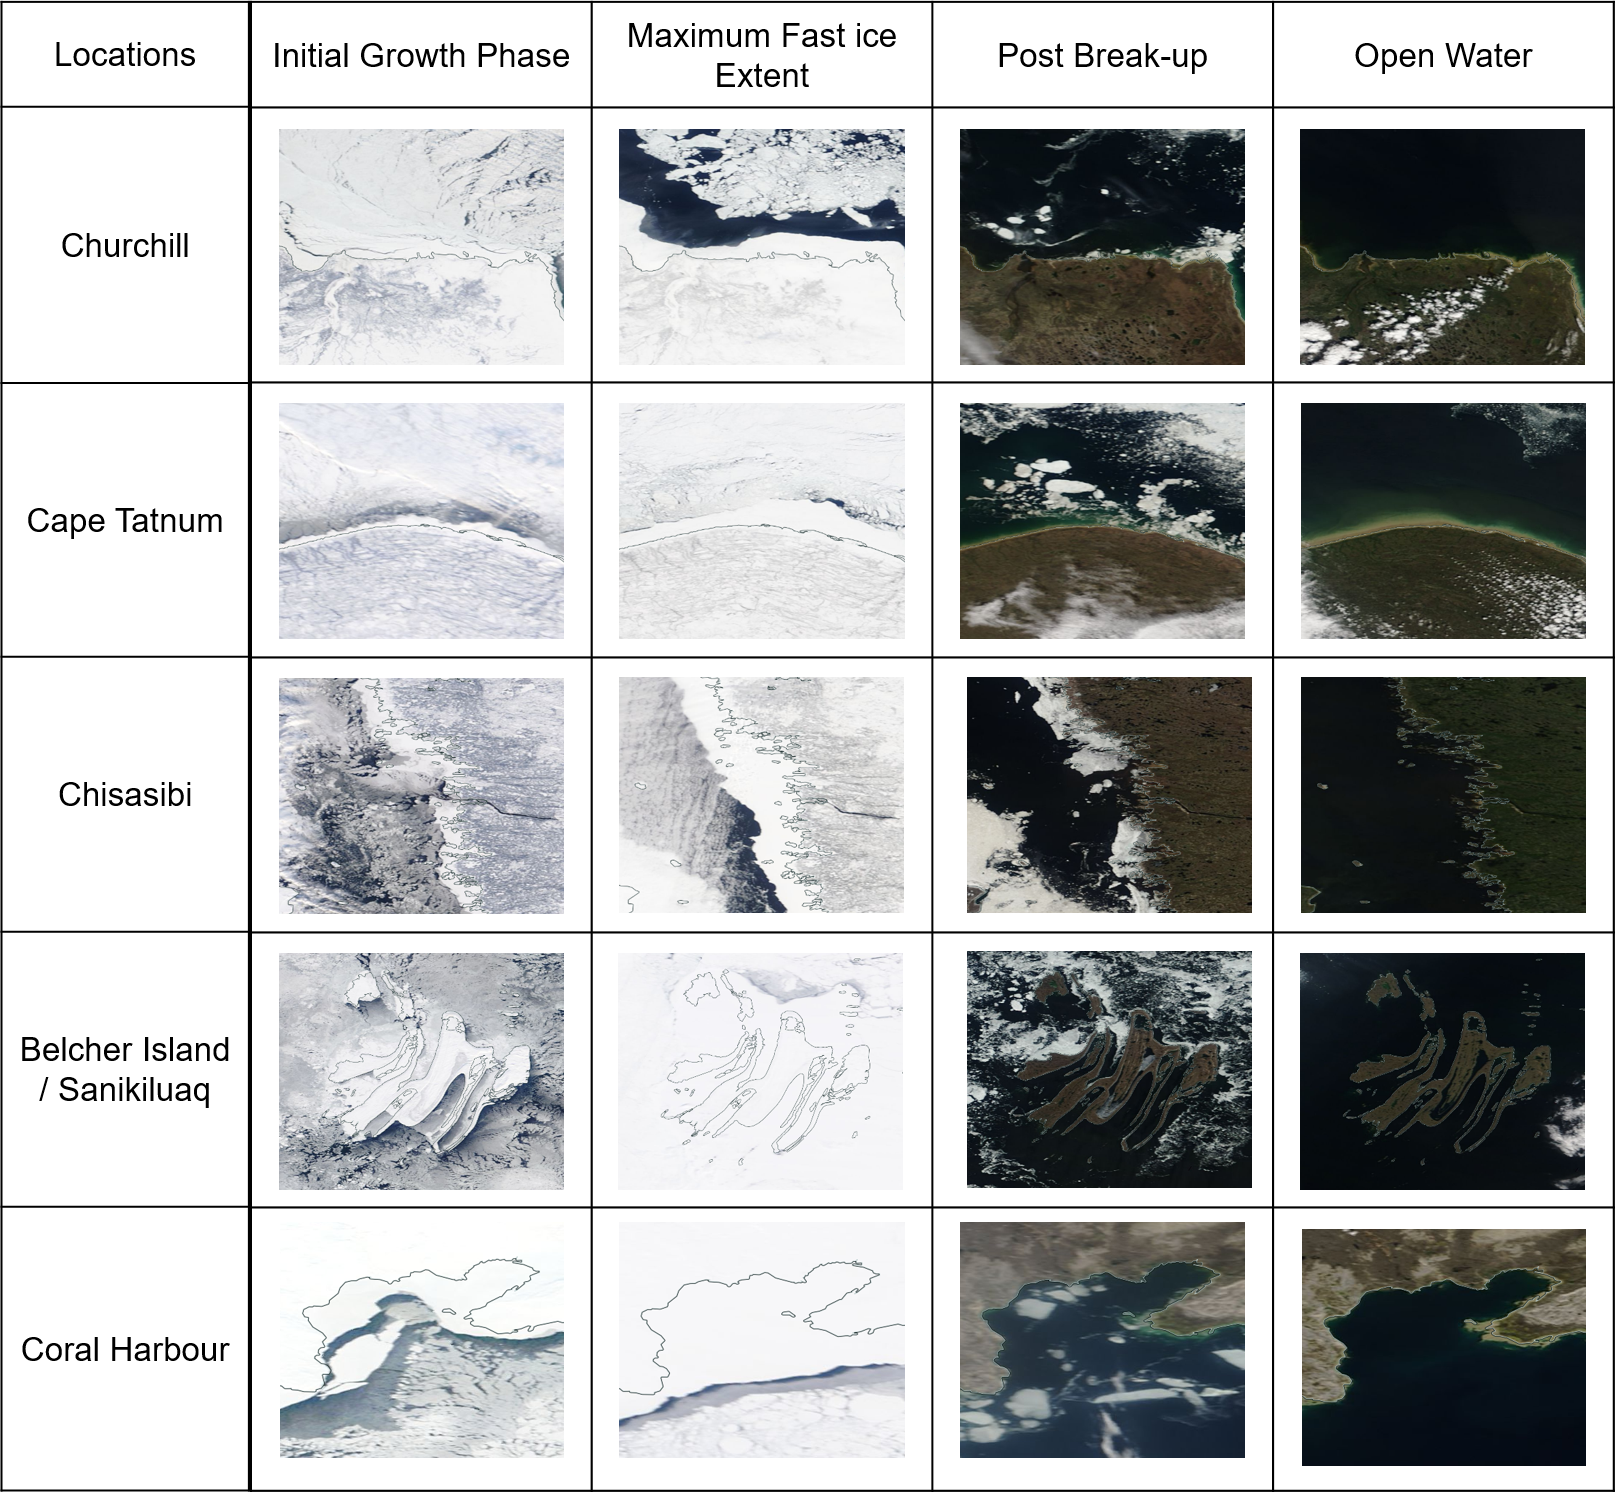


**Figure S3. A representation of the stages of fast-ice cycle showed using MODIS imagery.**


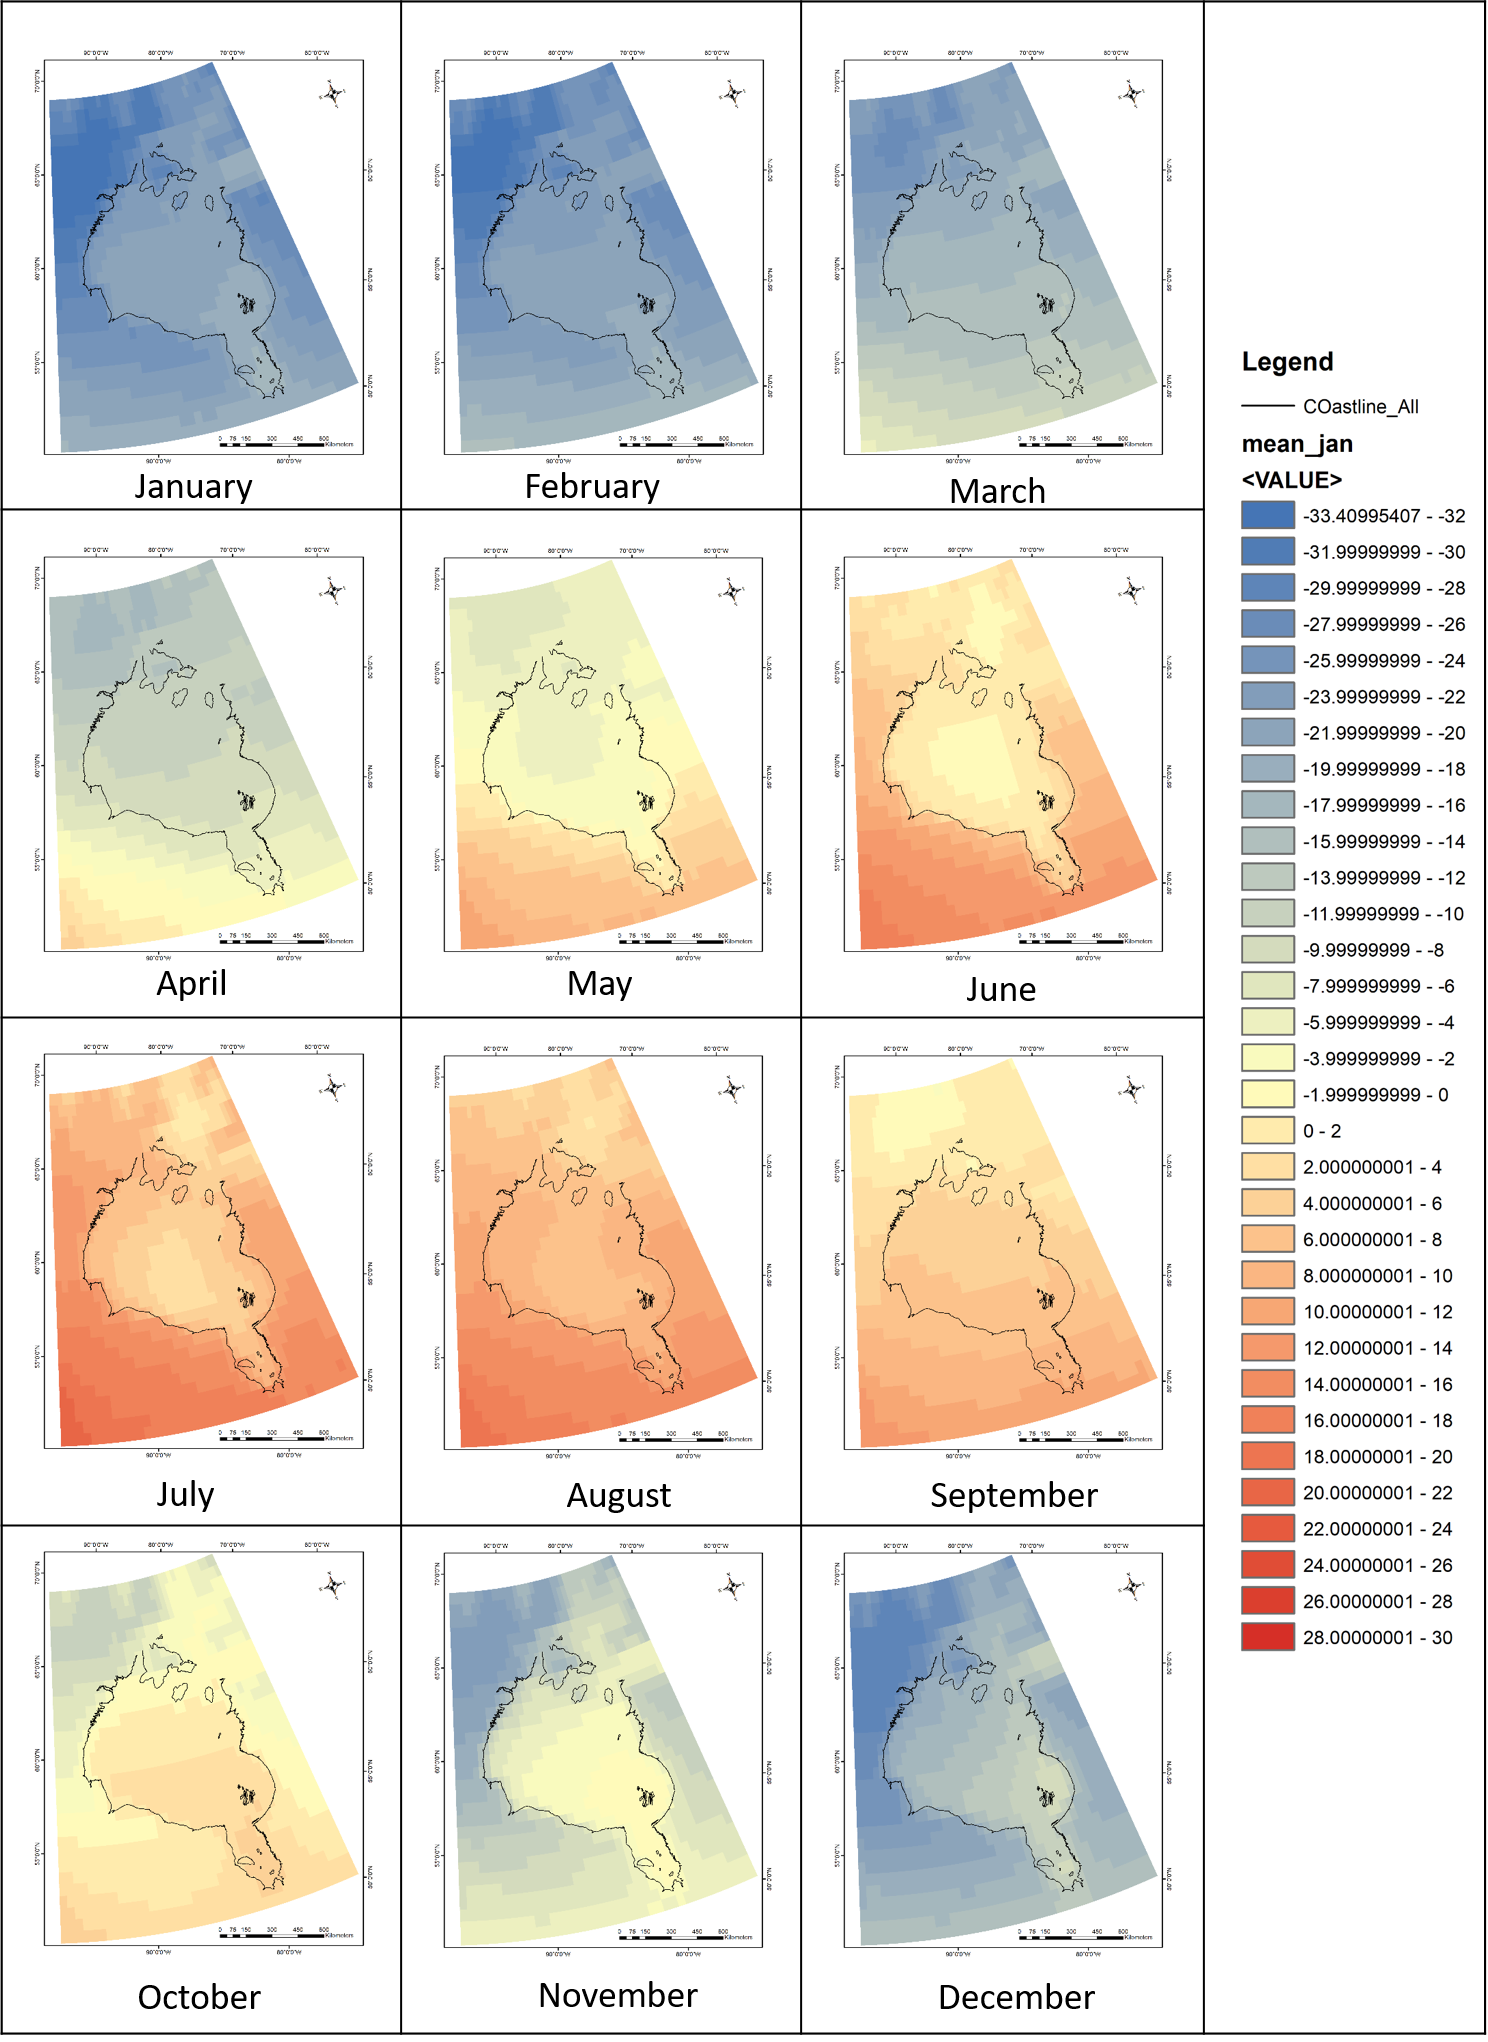


**Figure S4. Gradual warming and cooling pattern of air temperature across the study area**. This map shows the monthly mean air temperature over the Hudson Bay and James Bay region. Through this figure we get an idea of the warming and cooling patterns over the bay area. January and February are the coldest months with temperatures falling to –33°C in the northern part of Hudson Bay and –25°C in southern James Bay. Gradual warming starts from the southern part of James Bay and commences further north. Reversibly, gradual cooling starts from the northwestern part of Hudson Bay and progresses southwards.


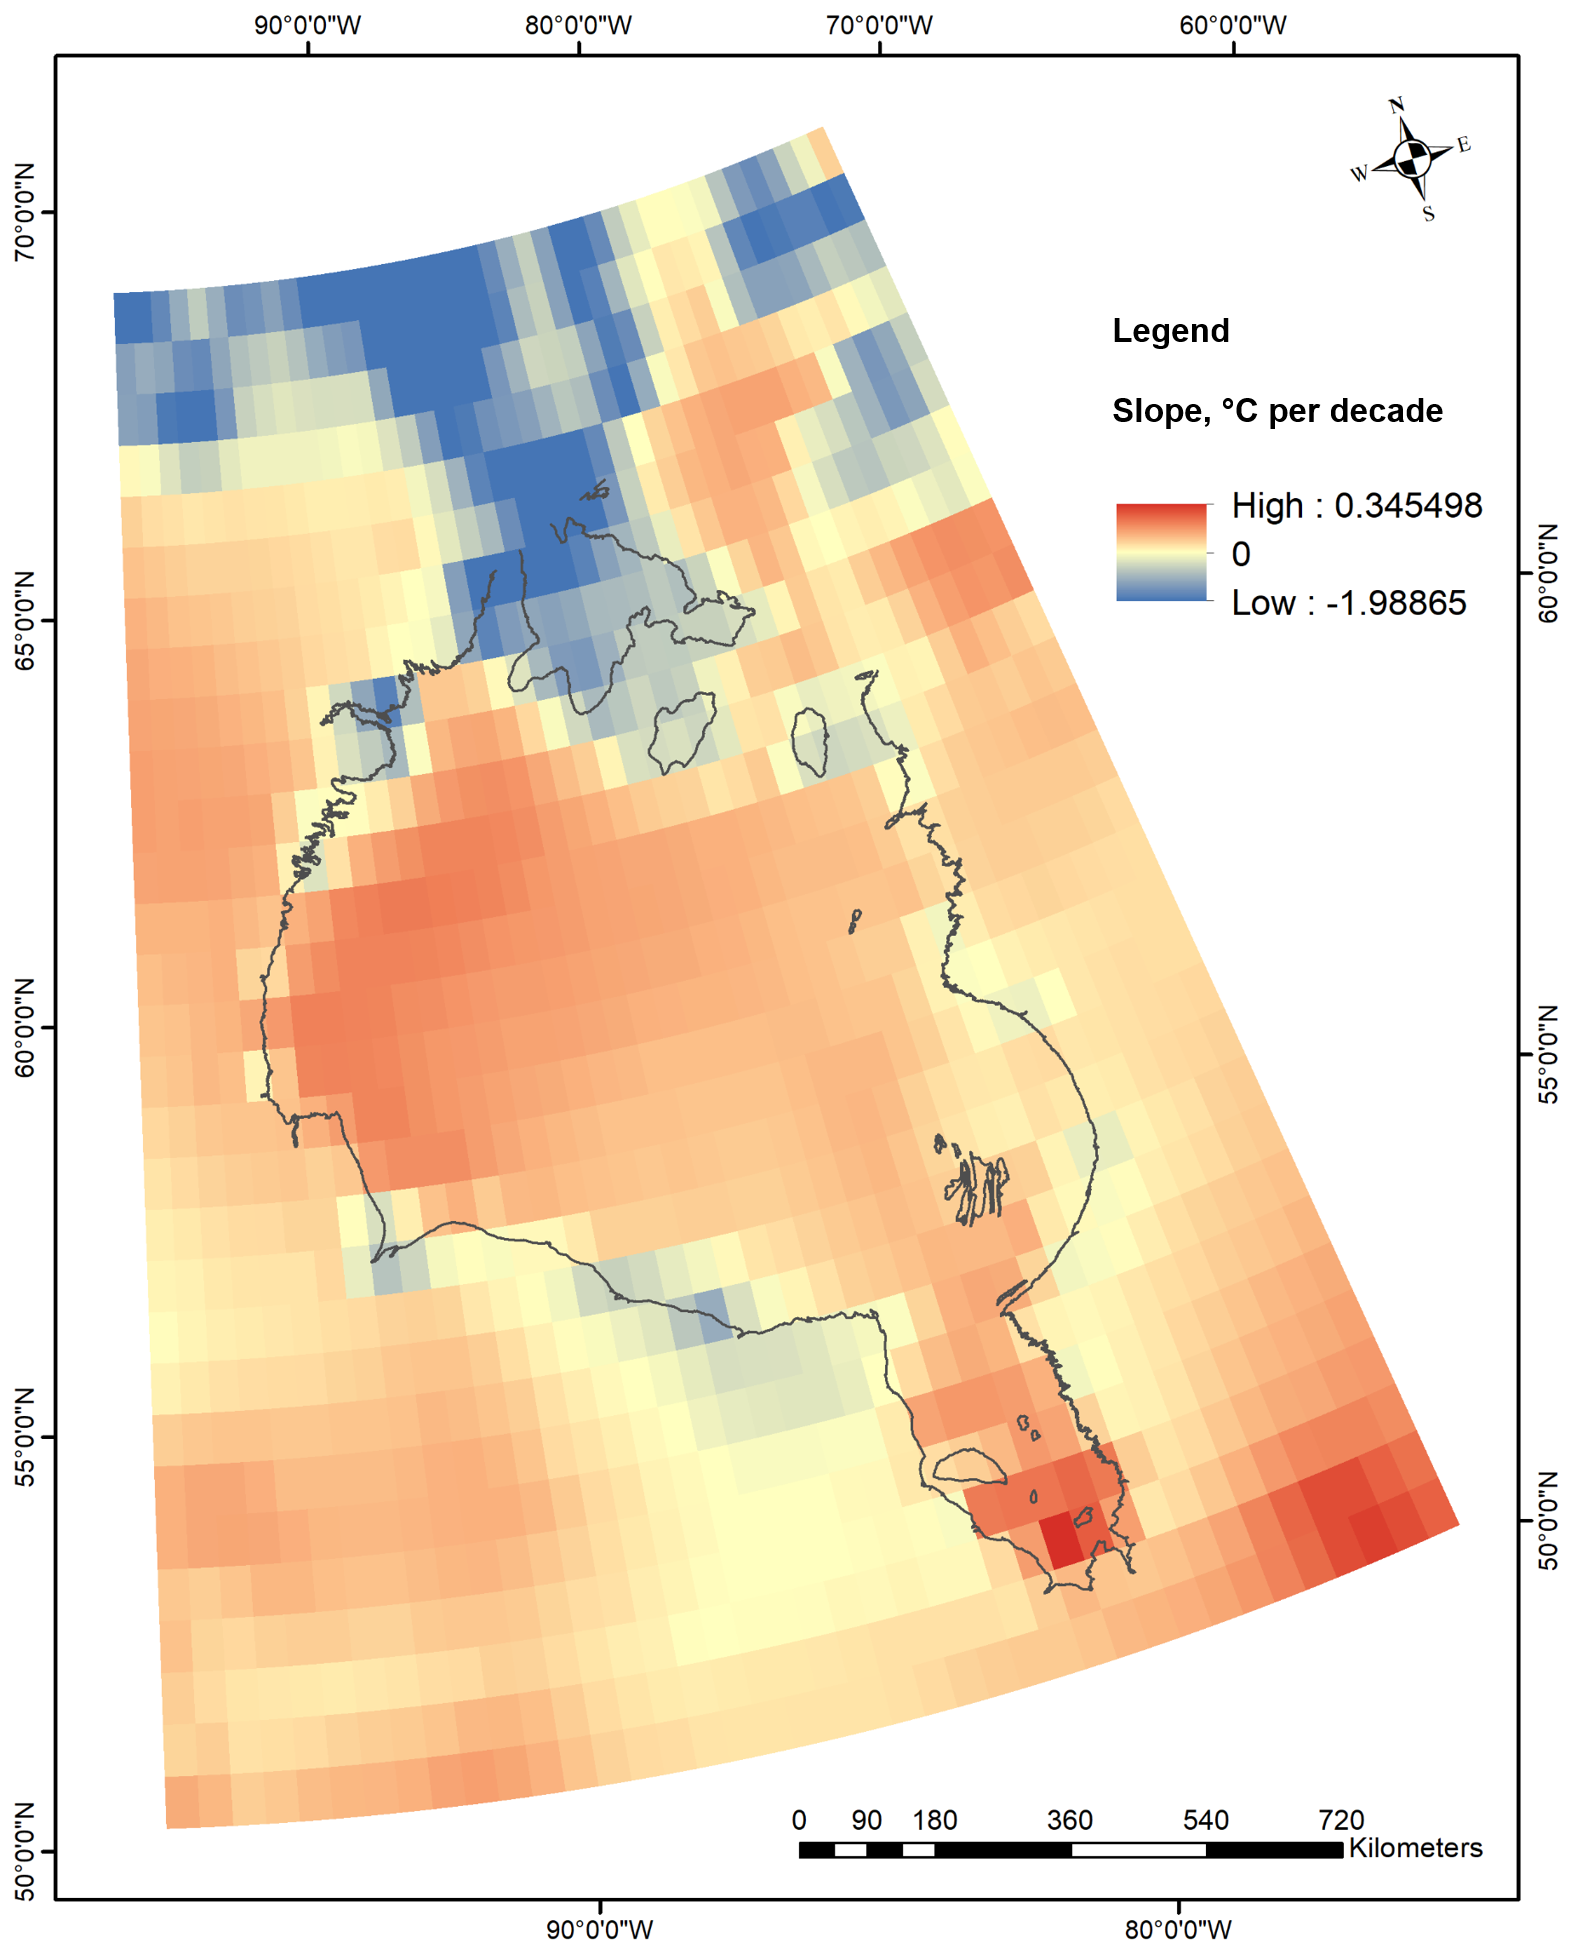


**Figure S5. Air temperature change across the study area over the 2000–2019 study period**. Trend of changing air temperature during the ice season (November to July) for the 2000–2019 study period over Hudson Bay and James Bay obtained from MERRA-2 reanalysis.


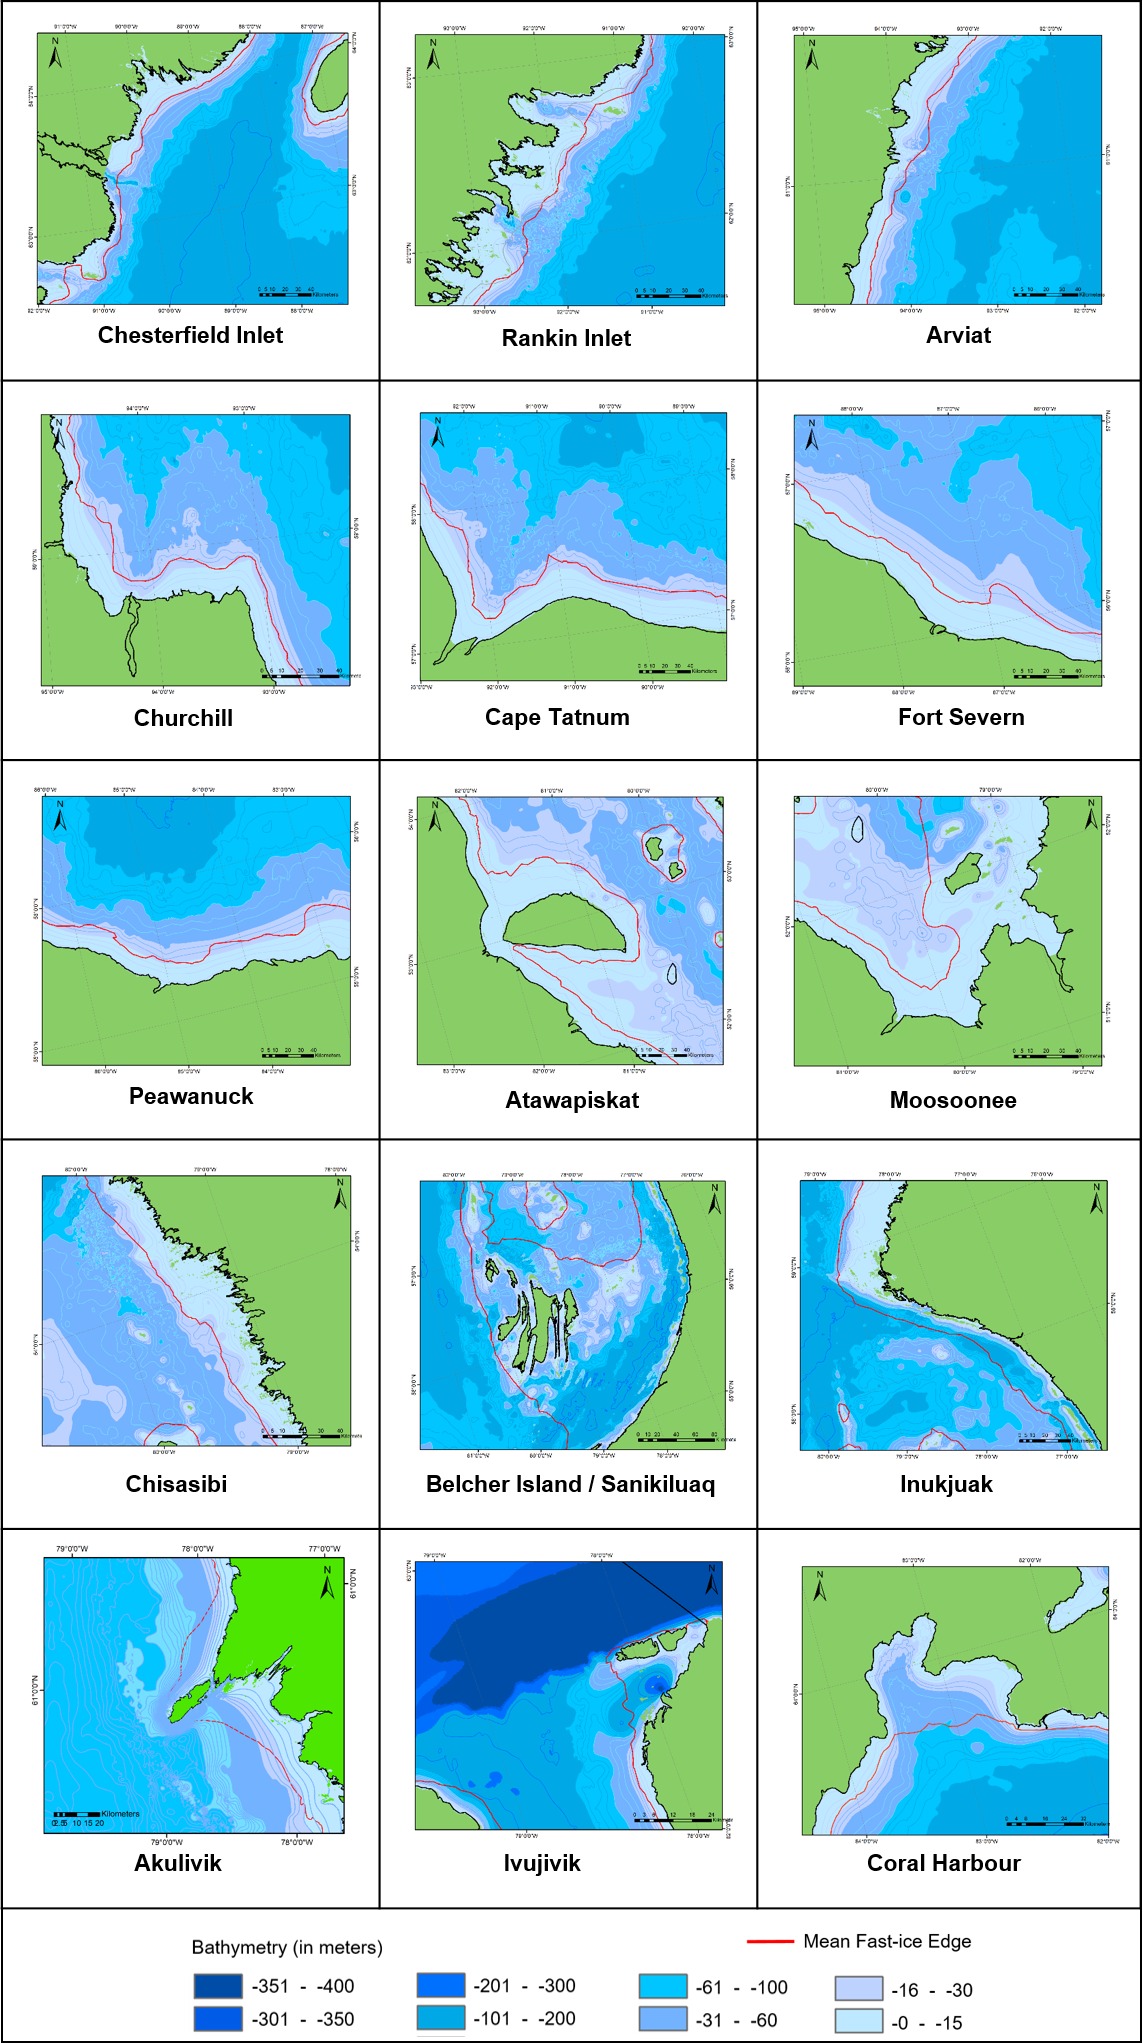


**Figure S6**. **Mean fast ice edge at 15 selected coastal communities/locations.**

**Table S1. Freeze-up days (in day of the year), recorded at 15 selected study locations from the years 2000–2018.**

| **Year** | **P1**a | **P2** | **P3** | **P4** | **P5** | **P6** | **P7** | **P8** | **P9** | **P10** | **P11** | **P12** | **P13** | **P14** | **P15** |
| --- | --- | --- | --- | --- | --- | --- | --- | --- | --- | --- | --- | --- | --- | --- | --- |
| **2000** | 303 | 310 | 322 | 320 | 342 | 344 | 343 | 340 | 341 | 345 | 355 | 363 | 359 | 359 | 327 |
| **2001** | 313 | 318 | 329 | 333 | 347 | 355 | 345 | 354 | 375 | 375 | 374 | 378 | 345 | 345 | 328 |
| **2002** | 305 | 307 | 320 | 320 | 337 | 341 | 330 | 334 | 336 | 341 | 357 | 346 | 378 | 378 | 336 |
| **2003** | 310 | 316 | 339 | 336 | 335 | 344 | 336 | 346 | 340 | 359 | 371 | 368 | 365 | 365 | 342 |
| **2004** | 308 | 311 | 328 | 335 | 343 | 339 | 343 | 338 | 338 | 342 | 355 | 348 | 355 | 355 | 325 |
| **2005** | 332 | 320 | 325 | 340 | 345 | 343 | 343 | 334 | 346 | 358 | 363 | 358 | 363 | 363 | 333 |
| **2006** | 324 | 324 | 327 | 327 | 352 | 341 | 345 | 339 | 362 | 361 | 370 | 364 | 377 | 377 | 337 |
| **2007** | 312 | 313 | 334 | 329 | 337 | 352 | 342 | 335 | 334 | 348 | 351 | 351 | 360 | 360 | 332 |
| **2008** | 312 | 314 | 331 | 327 | 335 | 354 | 344 | 341 | 359 | 349 | 361 | 352 | 353 | 353 | 327 |
| **2009** | 308 | 309 | 327 | 342 | 333 | 356 | 346 | 343 | 347 | 352 | 363 | 362 | 364 | 364 | 343 |
| **2010** | 328 | 325 | 331 | 349 | 339 | 345 | 345 | 342 | 351 | 370 | 386 | 386 | 388 | 388 | 354 |
| **2011** | 320 | 328 | 335 | 344 | 346 | 350 | 350 | 345 | 362 | 350 | 359 | 355 | 360 | 360 | 335 |
| **2012** | 321 | 321 | 332 | 331 | 335 | 344 | 342 | 335 | 347 | 362 | 365 | 365 | 368 | 368 | 334 |
| **2013** | 317 | 319 | 324 | 323 | 333 | 336 | 336 | 336 | 346 | 349 | 348 | 353 | 353 | 353 | 329 |
| **2014** | 318 | 321 | 328 | 331 | 326 | 332 | 334 | 324 | 337 | 339 | 353 | 359 | 363 | 363 | 332 |
| **2015** | 311 | 313 | 331 | 342 | 349 | 355 | 362 | 352 | 364 | 367 | 363 | 362 | 345 | 345 | 324 |
| **2016** | 318 | 328 | 338 | 350 | 354 | 353 | 353 | 353 | 350 | 355 | 361 | 358 | 356 | 356 | 333 |
| **2017** | 311 | 307 | 333 | 333 | 344 | 335 | 336 | 346 | 358 | 347 | 355 | 360 | 363 | 363 | 331 |
| **2018** | 310 | 310 | 325 | 327 | 333 | 326 | 340 | 340 | 363 | 342 | 358 | 344 | 361 | 361 | 329 |

aThe abbreviations indicate the names of the selected study location, where P1- Chesterfield Inlet; P2- Rankin Inlet; P3- Arviat; P4- Churchill; P5- Cape Tatnum; P6- Fort Severn; P7- Peawanuck; P8- Attawapiskat; P9- Moosonee; P10- Chisasibi; P11- Sanikiluaq; P12- Inukjuak; P13- Akulivik; P14- Ivujivik; P15- Coral Harbour.

**Table S2. Fall Transition days, signifying the transition day when temperatures went from above 0°C to a continues negative (below 0°C), recorded at 15 selected study locations from the years 2000–2018.**

| **Year** | **P1**a | **P2** | **P3** | **P4** | **P5** | **P6** | **P7** | **P8** | **P9** | **P10** | **P11** | **P12** | **P13** | **P14** | **P15** |
| --- | --- | --- | --- | --- | --- | --- | --- | --- | --- | --- | --- | --- | --- | --- | --- |
| **2000** | 284 | 284 | 303 | 305 | 309 | 315 | 322 | 316 | 316 | 332 | 321 | 316 | 316 | 310 | 269 |
| **2001** | 288 | 293 | 293 | 292 | 310 | 307 | 311 | 320 | 330 | 329 | 323 | 310 | 310 | 310 | 289 |
| **2002** | 293 | 284 | 284 | 285 | 296 | 296 | 296 | 298 | 301 | 308 | 301 | 298 | 298 | 298 | 294 |
| **2003** | 284 | 286 | 287 | 287 | 323 | 323 | 324 | 324 | 326 | 325 | 325 | 325 | 324 | 295 | 290 |
| **2004** | 283 | 285 | 287 | 303 | 310 | 304 | 310 | 310 | 329 | 329 | 308 | 308 | 306 | 293 | 278 |
| **2005** | 301 | 301 | 301 | 302 | 316 | 312 | 317 | 318 | 334 | 334 | 317 | 318 | 317 | 301 | 301 |
| **2006** | 302 | 304 | 305 | 301 | 314 | 307 | 314 | 328 | 349 | 330 | 328 | 302 | 301 | 299 | 302 |
| **2007** | 293 | 294 | 299 | 299 | 307 | 301 | 320 | 319 | 319 | 324 | 319 | 308 | 302 | 289 | 286 |
| **2008** | 283 | 292 | 300 | 300 | 310 | 311 | 320 | 320 | 320 | 321 | 321 | 320 | 318 | 303 | 288 |
| **2009** | 283 | 283 | 301 | 304 | 305 | 316 | 315 | 330 | 331 | 332 | 328 | 328 | 291 | 284 | 286 |
| **2010** | 297 | 286 | 315 | 301 | 317 | 317 | 332 | 317 | 336 | 336 | 351 | 336 | 316 | 353 | 304 |
| **2011** | 306 | 305 | 307 | 295 | 312 | 312 | 319 | 319 | 330 | 330 | 320 | 311 | 310 | 296 | 290 |
| **2012** | 281 | 297 | 299 | 300 | 307 | 307 | 308 | 326 | 340 | 340 | 327 | 308 | 307 | 302 | 276 |
| **2013** | 286 | 286 | 290 | 289 | 310 | 310 | 312 | 322 | 323 | 323 | 322 | 311 | 297 | 297 | 291 |
| **2014** | 281 | 282 | 298 | 299 | 315 | 309 | 310 | 310 | 308 | 312 | 311 | 301 | 300 | 296 | 282 |
| **2015** | 277 | 280 | 297 | 297 | 306 | 324 | 324 | 324 | 359 | 345 | 325 | 324 | 297 | 281 | 277 |
| **2016** | 278 | 298 | 312 | 299 | 318 | 322 | 322 | 323 | 325 | 324 | 323 | 323 | 322 | 279 | 279 |
| **2017** | 296 | 296 | 296 | 296 | 297 | 297 | 304 | 304 | 340 | 340 | 304 | 298 | 297 | 297 | 297 |
| **2018** | 268 | 267 | 285 | 276 | 306 | 303 | 311 | 312 | 312 | 330 | 312 | 283 | 301 | 279 | 269 |

aThe abbreviations indicate the names of the selected study location, where P1- Chesterfield Inlet; P2- Rankin Inlet; P3- Arviat; P4- Churchill; P5- Cape Tatnum; P6- Fort Severn; P7- Peawanuck; P8- Attawapiskat; P9- Moosonee; P10- Chisasibi; P11- Sanikiluaq; P12- Inukjuak; P13- Akulivik; P14- Ivujivik; P15- Coral Harbour.

**Table S3. Break-up days (in day of the year), recorded at 15 selected study locations from the years 2001–2019.**

| **Year** | **P1**a | **P2** | **P3** | **P4** | **P5** | **P6** | **P7** | **P8** | **P9** | **P10** | **P11** | **P12** | **P13** | **P14** | **P15** |
| --- | --- | --- | --- | --- | --- | --- | --- | --- | --- | --- | --- | --- | --- | --- | --- |
| **2001** | 179 | 180 | 165 | 157 | 153 | 141 | 146 | 126 | 128 | 151 | 149 | 152 | 162 | 162 | 180 |
| **2002** | 187 | 189 | 181 | 176 | 175 | 164 | 171 | 147 | 135 | 154 | 172 | 178 | 181 | 181 | 189 |
| **2003** | 183 | 179 | 167 | 157 | 153 | 147 | 157 | 139 | 138 | 145 | 168 | 170 | 163 | 163 | 186 |
| **2004** | 194 | 196 | 186 | 183 | 187 | 175 | 182 | 146 | 137 | 160 | 180 | 178 | 181 | 181 | 192 |
| **2005** | 185 | 186 | 175 | 171 | 160 | 145 | 147 | 132 | 128 | 140 | 156 | 158 | 169 | 169 | 183 |
| **2006** | 177 | 177 | 170 | 158 | 152 | 149 | 152 | 127 | 124 | 135 | 154 | 156 | 156 | 156 | 177 |
| **2007** | 189 | 191 | 175 | 165 | 160 | 141 | 157 | 130 | 133 | 147 | 164 | 173 | 182 | 182 | 193 |
| **2008** | 183 | 184 | 175 | 172 | 171 | 155 | 170 | 137 | 129 | 145 | 158 | 162 | 163 | 163 | 184 |
| **2009** | 187 | 190 | 182 | 184 | 176 | 167 | 175 | 148 | 138 | 156 | 178 | 178 | 176 | 176 | 189 |
| **2010** | 184 | 186 | 179 | 164 | 155 | 149 | 150 | 132 | 130 | 124 | 153 | 161 | 161 | 161 | 185 |
| **2011** | 182 | 185 | 173 | 167 | 159 | 155 | 159 | 134 | 139 | 141 | 164 | 169 | 172 | 172 | 184 |
| **2012** | 179 | 184 | 171 | 169 | 166 | 154 | 161 | 136 | 135 | 141 | 166 | 166 | 167 | 167 | 186 |
| **2013** | 181 | 182 | 172 | 165 | 164 | 151 | 166 | 141 | 140 | 145 | 164 | 168 | 171 | 171 | 186 |
| **2014** | 177 | 180 | 170 | 168 | 166 | 162 | 163 | 137 | 143 | 148 | 162 | 166 | 168 | 168 | 181 |
| **2015** | 184 | 187 | 171 | 166 | 159 | 154 | 161 | 131 | 136 | 153 | 169 | 164 | 170 | 170 | 192 |
| **2016** | 179 | 182 | 170 | 166 | 168 | 153 | 166 | 136 | 139 | 152 | 168 | 168 | 173 | 173 | 186 |
| **2017** | 174 | 178 | 167 | 168 | 160 | 150 | 158 | 143 | 141 | 147 | 156 | 161 | 165 | 165 | 174 |
| **2018** | 182 | 187 | 170 | 167 | 162 | 155 | 163 | 141 | 140 | 159 | 177 | 182 | 188 | 188 | 190 |
| **2019** | 192 | 185 | 172 | 166 | 166 | 148 | 165 | 137 | 137 | 159 | 180 | 153 | 154 | 154 | 184 |

aThe abbreviations indicate the names of the selected study location, where P1- Chesterfield Inlet; P2- Rankin Inlet; P3- Arviat; P4- Churchill; P5- Cape Tatnum; P6- Fort Severn; P7- Peawanuck; P8- Attawapiskat; P9- Moosonee; P10- Chisasibi; P11- Sanikiluaq; P12- Inukjuak; P13- Akulivik; P14- Ivujivik; P15- Coral Harbour.

**Table S4. Spring Transition days, signifying the transition day when temperatures went from below 0°C to a continues positive (above 0°C), recorded at 15 selected study locations from the year 2001 to year 2019.**

| **Year** | **P1**a | **P2** | **P3** | **P4** | **P5** | **P6** | **P7** | **P8** | **P9** | **P10** | **P11** | **P12** | **P13** | **P14** | **P15** |
| --- | --- | --- | --- | --- | --- | --- | --- | --- | --- | --- | --- | --- | --- | --- | --- |
| **2001** | 160 | 160 | 167 | 159 | 165 | 164 | 165 | 124 | 109 | 125 | 144 | 162 | 128 | 164 | 162 |
| **2002** | 151 | 144 | 142 | 133 | 135 | 134 | 156 | 119 | 116 | 135 | 136 | 136 | 115 | 159 | 152 |
| **2003** | 156 | 157 | 154 | 153 | 162 | 145 | 163 | 139 | 114 | 158 | 157 | 160 | 116 | 164 | 155 |
| **2004** | 160 | 143 | 141 | 134 | 135 | 132 | 158 | 128 | 117 | 129 | 133 | 164 | 152 | 164 | 156 |
| **2005** | 158 | 160 | 161 | 160 | 175 | 150 | 163 | 131 | 125 | 152 | 152 | 153 | 116 | 174 | 158 |
| **2006** | 154 | 150 | 157 | 140 | 159 | 133 | 139 | 115 | 114 | 134 | 134 | 116 | 137 | 141 | 150 |
| **2007** | 151 | 151 | 151 | 131 | 150 | 149 | 150 | 107 | 100 | 144 | 133 | 133 | 154 | 157 | 151 |
| **2008** | 164 | 160 | 160 | 140 | 151 | 140 | 151 | 137 | 107 | 142 | 143 | 158 | 125 | 159 | 161 |
| **2009** | 156 | 141 | 142 | 141 | 148 | 142 | 141 | 140 | 123 | 128 | 139 | 132 | 155 | 164 | 160 |
| **2010** | 165 | 156 | 157 | 156 | 162 | 156 | 159 | 131 | 117 | 156 | 156 | 157 | 133 | 170 | 155 |
| **2011** | 166 | 156 | 160 | 144 | 157 | 131 | 131 | 129 | 131 | 132 | 142 | 143 | 155 | 166 | 146 |
| **2012** | 161 | 158 | 158 | 150 | 153 | 153 | 154 | 129 | 111 | 137 | 148 | 149 | 133 | 166 | 157 |
| **2013** | 155 | 150 | 153 | 147 | 165 | 151 | 152 | 127 | 121 | 149 | 151 | 151 | 139 | 163 | 155 |
| **2014** | 156 | 153 | 154 | 133 | 156 | 155 | 156 | 135 | 113 | 147 | 148 | 148 | 134 | 167 | 157 |
| **2015** | 156 | 142 | 141 | 140 | 150 | 143 | 143 | 138 | 119 | 138 | 141 | 141 | 123 | 157 | 144 |
| **2016** | 160 | 151 | 150 | 150 | 151 | 151 | 151 | 116 | 115 | 146 | 151 | 158 | 135 | 171 | 156 |
| **2017** | 156 | 156 | 163 | 137 | 164 | 138 | 162 | 137 | 120 | 144 | 148 | 154 | 129 | 166 | 160 |
| **2018** | 147 | 139 | 139 | 139 | 169 | 139 | 140 | 130 | 130 | 141 | 141 | 141 | 150 | 148 | 146 |
| **2019** | 160 | 159 | 158 | 157 | 147 | 154 | 161 | 144 | 120 | 145 | 162 | 162 | 137 | 167 | 161 |

aThe abbreviations indicate the names of the selected study location, where P1- Chesterfield Inlet; P2- Rankin Inlet; P3- Arviat; P4- Churchill; P5- Cape Tatnum; P6- Fort Severn; P7- Peawanuck; P8- Attawapiskat; P9- Moosonee; P10- Chisasibi; P11- Sanikiluaq; P12- Inukjuak; P13- Akulivik; P14- Ivujivik; P15- Coral Harbour.

**Table S5. Distance of the mean fast-ice edge from the coastline at every 100 km of the coastal stretch (starting from Ivujivik and ending at north of Chesterfield Inlet).**

| **Distance** | **2001** | **2002** | **2003** | **2004** | **2005** | **2006** | **2007** | **2008** | **2009** | **2010** | **2011** | **2012** | **2013** | **2014** | **2015** | **2016** | **2017** | **2018** | **2019** |
| --- | --- | --- | --- | --- | --- | --- | --- | --- | --- | --- | --- | --- | --- | --- | --- | --- | --- | --- | --- |
| **100** | 26.58 | 19.25 | 21.07 | 10.00 | 24.40 | 12.29 | 23.20 | 0.26 | 6.68 | 0.45 | 10.10 | 14.87 | 6.30 | 1.44 | 5.11 | 6.30 | 6.30 | 6.30 | 6.30 |
| **200** | 4.49 | 3.13 | 3.69 | 2.68 | 2.73 | 22.65 | 4.12 | 3.18 | 4.81 | 3.71 | 2.70 | 4.85 | 4.04 | 3.80 | 3.17 | 3.06 | 3.55 | 3.99 | 3.64 |
| **300** | 14.28 | 13.48 | 15.31 | 12.60 | 10.43 | 9.43 | 10.74 | 11.22 | 13.92 | 9.19 | 9.95 | 13.66 | 12.81 | 11.90 | 20.31 | 13.71 | 11.79 | 14.10 | 13.57 |
| **400** | 22.93 | 15.00 | 24.00 | 16.23 | 16.62 | 13.00 | 12.07 | 20.11 | 27.67 | 12.79 | 13.05 | 20.24 | 17.08 | 13.59 | 30.41 | 26.77 | 17.70 | 26.95 | 19.56 |
| **500** | 6.85 | 10.14 | 21.54 | 7.51 | 7.35 | 3.11 | 9.44 | 5.24 | 4.98 | 4.88 | 4.03 | 7.62 | 9.44 | 15.19 | 13.93 | 20.42 | 7.77 | 20.67 | 11.13 |
| **600** | 17.88 | 16.74 | 19.00 | 17.79 | 22.09 | 14.05 | 13.63 | 24.44 | 21.99 | 13.16 | 13.16 | 17.56 | 13.16 | 24.49 | 18.14 | 20.52 | 14.66 | 13.16 | 13.16 |
| **700** | 33.43 | 32.19 | 37.29 | 32.43 | 34.91 | 35.06 | 34.26 | 40.89 | 40.02 | 33.80 | 33.59 | 35.01 | 33.80 | 41.16 | 37.88 | 40.71 | 34.07 | 33.80 | 33.80 |
| **800** | 16.75 | 7.95 | 21.58 | 7.71 | 11.67 | 25.24 | 11.10 | 32.83 | 23.93 | 12.16 | 10.87 | 16.74 | 20.14 | 36.81 | 53.95 | 17.55 | 19.28 | 30.40 | 11.43 |
| **900** | 28.09 | 22.15 | 26.18 | 33.35 | 18.79 | 27.48 | 23.25 | 40.11 | 38.90 | 19.20 | 26.41 | 24.74 | 30.89 | 35.03 | 91.73 | 30.74 | 24.67 | 38.12 | 21.10 |
| **1000** | 36.81 | 32.61 | 37.35 | 46.35 | 32.34 | 33.05 | 34.85 | 48.46 | 141.23 | 30.77 | 34.75 | 37.10 | 38.81 | 42.76 | 107.89 | 43.60 | 35.99 | 49.76 | 33.76 |
| **1100** | 26.61 | 25.77 | 25.00 | 30.98 | 24.02 | 18.66 | 28.37 | 32.67 | 47.30 | 24.93 | 29.60 | 30.26 | 27.53 | 29.48 | 109.38 | 39.19 | 24.65 | 44.51 | 28.62 |
| **1200** | 10.25 | 10.98 | 10.85 | 15.64 | 9.42 | 4.28 | 15.18 | 18.37 | 32.27 | 11.50 | 15.09 | 24.76 | 15.31 | 12.20 | 99.38 | 24.11 | 7.24 | 32.17 | 18.52 |
| **1300** | 17.26 | 17.44 | 22.84 | 28.87 | 17.62 | 8.07 | 19.85 | 26.64 | 33.21 | 22.77 | 15.22 | 30.39 | 22.25 | 17.67 | 112.53 | 32.16 | 22.25 | 49.94 | 30.75 |
| **1400** | 23.72 | 25.91 | 25.58 | 31.39 | 25.10 | 10.46 | 32.26 | 32.51 | 32.46 | 30.78 | 22.17 | 30.01 | 24.50 | 24.40 | 109.46 | 32.32 | 28.11 | 63.94 | 31.94 |
| **1500** | 29.11 | 22.81 | 25.40 | 26.69 | 29.55 | 4.23 | 25.51 | 33.55 | 27.80 | 30.75 | 26.94 | 27.82 | 31.97 | 31.20 | 83.11 | 27.60 | 30.67 | 44.87 | 30.17 |
| **1600** | 19.85 | 18.97 | 17.98 | 17.82 | 18.16 | 11.33 | 19.64 | 26.82 | 20.59 | 23.11 | 27.07 | 23.82 | 20.33 | 23.41 | 56.09 | 21.01 | 28.80 | 20.00 | 20.12 |
| **1700** | 7.43 | 7.31 | 14.10 | 5.51 | 7.65 | 3.48 | 7.77 | 14.06 | 11.04 | 7.15 | 10.61 | 9.82 | 10.32 | 8.86 | 60.61 | 11.03 | 17.26 | 8.32 | 6.81 |
| **1800** | 9.91 | 7.67 | 16.60 | 8.13 | 10.00 | 7.44 | 10.89 | 16.10 | 10.61 | 9.58 | 19.91 | 11.97 | 11.65 | 12.01 | 73.46 | 12.54 | 17.88 | 10.35 | 11.36 |
| **1900** | 1.41 | 3.38 | 31.45 | 5.49 | 9.34 | 5.43 | 3.76 | 10.55 | 5.53 | 3.17 | 9.09 | 8.88 | 5.10 | 19.02 | 108.66 | 10.19 | 14.35 | 10.24 | 4.61 |
| **2000** | 7.75 | 34.26 | 11.88 | 47.27 | 13.39 | 43.44 | 6.50 | 11.40 | 6.16 | 6.96 | 6.50 | 7.09 | 6.69 | 7.94 | 139.38 | 5.86 | 25.51 | 8.90 | 13.59 |
| **2100** | 11.60 | 6.48 | 6.48 | 24.80 | 11.83 | 6.48 | 12.50 | 9.35 | 20.27 | 19.71 | 39.53 | 16.94 | 16.54 | 14.05 | 188.73 | 12.44 | 19.21 | 10.48 | 36.56 |
| **2200** | 13.20 | 5.88 | 10.06 | 2.75 | 10.20 | 8.02 | 23.18 | 25.71 | 45.40 | 11.63 | 58.04 | 28.08 | 32.59 | 24.60 | 206.77 | 12.04 | 27.28 | 27.89 | 31.03 |
| **2300** | 3.12 | 21.39 | 7.50 | 7.86 | 5.26 | 12.95 | 60.73 | 33.71 | 76.09 | 0.55 | 40.62 | 57.63 | 69.67 | 62.84 | 171.66 | 11.31 | 49.72 | 69.57 | 62.32 |
| **2400** | 6.44 | 40.28 | 2.73 | 71.27 | 10.59 | 8.56 | 93.03 | 16.13 | 119.33 | 9.57 | 15.69 | 29.02 | 85.04 | 75.88 | 124.35 | 12.57 | 69.81 | 109.87 | 89.99 |
| **2500** | 2.04 | 7.94 | 7.26 | 43.45 | 11.75 | 7.14 | 68.47 | 10.87 | 75.97 | 8.99 | 12.74 | 9.18 | 63.13 | 31.49 | 80.78 | 7.97 | 27.00 | 61.96 | 50.41 |
| **2600** | 18.55 | 7.74 | 18.19 | 7.74 | 17.13 | 18.62 | 19.88 | 16.04 | 29.10 | 17.54 | 15.93 | 18.45 | 26.06 | 15.77 | 29.96 | 17.87 | 15.66 | 21.14 | 19.67 |
| **2700** | 12.16 | 15.12 | 9.17 | 7.86 | 14.40 | 11.51 | 15.52 | 13.52 | 12.83 | 12.24 | 12.50 | 13.68 | 14.69 | 19.86 | 19.96 | 13.98 | 13.31 | 16.68 | 15.58 |
| **2800** | 15.36 | 20.97 | 14.75 | 14.89 | 17.53 | 13.83 | 19.81 | 17.88 | 18.80 | 18.18 | 19.03 | 19.53 | 25.35 | 26.22 | 20.50 | 23.16 | 19.36 | 20.76 | 22.17 |
| **2900** | 8.77 | 19.11 | 17.04 | 12.83 | 15.87 | 14.17 | 18.88 | 16.06 | 17.99 | 18.30 | 19.89 | 20.63 | 19.87 | 20.89 | 20.74 | 21.55 | 19.57 | 20.96 | 21.77 |
| **3000** | 6.97 | 23.46 | 23.42 | 11.12 | 25.93 | 16.56 | 26.74 | 24.15 | 24.19 | 25.34 | 25.69 | 24.70 | 25.02 | 27.19 | 26.40 | 27.75 | 25.75 | 26.55 | 26.98 |
| **3100** | 6.47 | 19.29 | 19.15 | 4.46 | 18.10 | 11.34 | 24.61 | 15.60 | 21.21 | 18.39 | 22.01 | 18.73 | 18.73 | 26.26 | 19.25 | 18.70 | 23.24 | 22.04 | 25.68 |
| **3200** | 10.23 | 19.71 | 12.31 | 10.17 | 21.23 | 15.88 | 22.98 | 17.45 | 21.03 | 19.14 | 23.96 | 21.73 | 18.61 | 25.55 | 19.75 | 19.96 | 18.45 | 18.88 | 23.27 |
| **3300** | 21.68 | 24.65 | 21.25 | 16.40 | 25.03 | 23.30 | 25.46 | 24.96 | 26.14 | 25.53 | 25.42 | 24.64 | 24.45 | 25.32 | 25.83 | 25.15 | 25.28 | 24.76 | 27.08 |
| **3400** | 13.49 | 17.31 | 12.77 | 9.08 | 18.48 | 11.49 | 18.05 | 17.79 | 18.14 | 19.42 | 17.91 | 13.80 | 16.71 | 17.39 | 18.09 | 17.81 | 17.46 | 16.94 | 20.46 |
| **3500** | 9.90 | 14.91 | 10.62 | 5.61 | 13.50 | 7.16 | 14.51 | 12.80 | 12.40 | 12.32 | 11.74 | 12.79 | 12.55 | 12.95 | 12.85 | 16.42 | 11.40 | 13.55 | 19.07 |
| **3600** | 21.27 | 38.86 | 18.78 | 9.94 | 33.29 | 19.77 | 34.85 | 33.49 | 33.76 | 22.57 | 23.44 | 22.65 | 34.53 | 35.60 | 34.40 | 38.21 | 22.05 | 35.09 | 39.85 |
| **3700** | 8.18 | 50.40 | 5.86 | 5.56 | 34.46 | 9.91 | 41.55 | 35.12 | 33.15 | 28.42 | 32.86 | 12.63 | 36.05 | 41.69 | 48.43 | 36.61 | 14.48 | 37.37 | 37.22 |
| **3800** | 15.68 | 75.99 | 18.02 | 16.75 | 50.98 | 18.97 | 65.50 | 54.01 | 48.94 | 42.34 | 46.25 | 25.40 | 56.20 | 60.90 | 73.32 | 57.28 | 35.54 | 57.79 | 54.87 |
| **3900** | 2.97 | 73.08 | 11.88 | 7.05 | 61.23 | 11.40 | 71.07 | 60.14 | 60.87 | 31.08 | 52.00 | 28.86 | 59.00 | 62.17 | 73.66 | 30.14 | 30.59 | 63.60 | 61.98 |
| **4000** | 53.65 | 58.92 | 6.82 | 4.60 | 51.88 | 4.03 | 71.16 | 46.47 | 51.14 | 33.77 | 41.64 | 28.04 | 43.66 | 46.40 | 57.28 | 29.14 | 30.87 | 53.35 | 66.43 |
| **4100** | 65.60 | 67.56 | 32.48 | 26.33 | 62.77 | 23.21 | 79.57 | 57.65 | 60.14 | 62.07 | 60.57 | 57.49 | 62.75 | 62.25 | 65.46 | 59.89 | 57.26 | 63.79 | 70.82 |
| **4200** | 43.25 | 17.61 | 3.82 | 4.31 | 13.09 | 4.10 | 29.57 | 7.95 | 12.29 | 12.47 | 10.75 | 7.89 | 13.63 | 13.47 | 15.56 | 10.18 | 7.73 | 13.80 | 22.21 |
| **4300** | 4.90 | 40.60 | 17.70 | 7.46 | 24.67 | 10.07 | 53.91 | 23.22 | 36.04 | 33.33 | 22.19 | 14.33 | 40.75 | 30.40 | 34.46 | 23.53 | 14.15 | 36.40 | 43.56 |
| **4400** | 1.61 | 14.94 | 0.84 | 1.06 | 8.31 | 4.68 | 19.15 | 8.36 | 9.38 | 10.01 | 11.11 | 9.33 | 17.94 | 10.56 | 12.89 | 9.03 | 5.79 | 12.93 | 21.30 |
| **4500** | 7.05 | 12.47 | 6.26 | 7.13 | 8.74 | 5.71 | 15.11 | 12.41 | 12.00 | 11.33 | 11.51 | 11.93 | 14.61 | 11.22 | 13.54 | 11.71 | 10.20 | 13.02 | 14.17 |
| **4600** | 9.13 | 12.04 | 5.12 | 4.94 | 9.19 | 4.98 | 13.50 | 11.57 | 10.46 | 9.58 | 11.92 | 9.71 | 12.38 | 9.76 | 12.16 | 10.19 | 7.92 | 11.86 | 11.86 |
| **4700** | 10.99 | 24.49 | 16.62 | 25.22 | 11.89 | 29.31 | 20.56 | 25.60 | 22.89 | 19.77 | 19.79 | 16.59 | 25.29 | 24.55 | 24.60 | 19.14 | 16.24 | 22.63 | 24.80 |
| **4800** | 2.98 | 8.45 | 61.95 | 62.21 | 7.90 | 2.28 | 12.43 | 7.11 | 11.21 | 7.84 | 9.63 | 10.63 | 14.62 | 12.60 | 11.43 | 9.98 | 7.53 | 8.54 | 14.08 |
| **4900** | 24.45 | 15.12 | 52.31 | 52.90 | 7.23 | 2.37 | 13.52 | 3.43 | 11.51 | 9.17 | 10.38 | 8.56 | 18.37 | 11.58 | 9.45 | 9.17 | 4.22 | 6.55 | 11.23 |
| **5000** | 10.96 | 19.61 | 3.39 | 1.26 | 14.08 | 13.21 | 23.09 | 14.60 | 14.60 | 13.47 | 15.06 | 13.22 | 17.16 | 15.08 | 16.07 | 16.31 | 14.44 | 12.99 | 16.92 |
| **5100** | 15.27 | 14.21 | 3.74 | 2.67 | 13.27 | 51.10 | 32.14 | 14.58 | 18.09 | 11.51 | 13.60 | 16.45 | 17.08 | 18.56 | 13.89 | 14.39 | 13.55 | 13.23 | 19.29 |
| **5200** | 12.40 | 16.81 | 5.90 | 2.52 | 11.47 | 8.96 | 44.78 | 9.96 | 12.83 | 10.74 | 12.49 | 10.84 | 15.07 | 15.57 | 12.07 | 11.64 | 10.74 | 11.88 | 16.80 |
| **5300** | 11.65 | 13.19 | 2.10 | 12.76 | 8.52 | 7.79 | 18.92 | 10.51 | 11.43 | 10.06 | 11.98 | 12.79 | 13.56 | 12.63 | 19.09 | 14.26 | 10.65 | 12.40 | 18.63 |
| **5400** | 12.64 | 21.87 | 5.53 | 3.50 | 16.09 | 12.78 | 28.42 | 11.83 | 15.99 | 9.01 | 18.58 | 20.05 | 21.98 | 26.03 | 22.66 | 17.56 | 19.27 | 17.76 | 22.76 |
| **5500** | 8.17 | 11.13 | 34.52 | 2.64 | 15.17 | 11.35 | 17.08 | 11.07 | 11.08 | 11.35 | 11.23 | 12.78 | 14.65 | 14.17 | 18.29 | 12.61 | 12.61 | 11.47 | 17.08 |
| **5600** | 15.83 | 21.73 | 17.94 | 3.63 | 14.66 | 4.91 | 21.38 | 20.09 | 17.49 | 11.81 | 17.41 | 23.88 | 19.70 | 22.70 | 20.83 | 20.15 | 22.68 | 21.22 | 22.81 |
| **5700** | 11.99 | 11.67 | 12.01 | 1.54 | 7.85 | 3.16 | 18.39 | 14.23 | 14.95 | 13.54 | 9.32 | 12.05 | 14.40 | 14.89 | 12.06 | 13.54 | 16.89 | 10.94 | 14.75 |
| **5800** | 8.92 | 7.04 | 9.49 | 4.04 | 9.62 | 5.73 | 12.84 | 9.90 | 11.59 | 6.92 | 6.92 | 10.13 | 10.94 | 14.20 | 11.06 | 8.01 | 15.68 | 7.88 | 9.34 |
| **5900** | 12.50 | 5.91 | 15.59 | 14.05 | 21.43 | 3.04 | 34.97 | 23.32 | 10.24 | 1.90 | 4.74 | 10.19 | 21.68 | 24.24 | 6.43 | 1.91 | 41.62 | 24.74 | 17.77 |
| **6000** | 10.60 | 12.52 | 10.23 | 2.49 | 8.73 | 6.65 | 8.42 | 11.39 | 13.34 | 9.27 | 8.62 | 16.60 | 8.38 | 10.72 | 11.70 | 8.81 | 19.05 | 8.67 | 8.26 |
| **6100** | 6.22 | 7.23 | 3.93 | 0.89 | 9.12 | 4.23 | 5.90 | 12.24 | 10.91 | 6.35 | 4.98 | 9.70 | 6.68 | 8.21 | 6.87 | 6.03 | 10.21 | 5.02 | 6.10 |
| **6200** | 11.26 | 11.22 | 10.59 | 8.64 | 14.41 | 5.82 | 10.19 | 9.66 | 10.11 | 10.10 | 11.89 | 12.04 | 14.08 | 14.08 | 11.47 | 12.23 | 12.98 | 12.97 | 11.93 |
| **6300** | 22.77 | 21.01 | 24.38 | 18.28 | 26.50 | 19.48 | 21.04 | 22.15 | 20.96 | 21.47 | 25.63 | 19.89 | 21.62 | 20.53 | 19.33 | 19.79 | 24.75 | 22.55 | 20.97 |
| **6400** | 12.02 | 13.05 | 7.75 | 7.96 | 15.21 | 6.95 | 11.32 | 12.19 | 12.30 | 14.40 | 10.91 | 10.70 | 13.84 | 15.79 | 12.07 | 15.56 | 21.41 | 14.43 | 15.99 |
| **6500** | 1.70 | 2.35 | 2.15 | 2.25 | 2.93 | 1.21 | 2.13 | 2.25 | 2.96 | 2.16 | 2.09 | 2.08 | 3.30 | 3.20 | 2.20 | 3.03 | 3.08 | 3.22 | 8.04 |
| **6600** | 0.64 | 4.22 | 7.61 | 1.36 | 4.23 | 1.97 | 3.46 | 7.08 | 8.94 | 2.68 | 2.47 | 8.82 | 6.13 | 4.77 | 2.85 | 2.82 | 10.20 | 2.33 | 2.95 |
| **6700** | 7.90 | 9.48 | 8.69 | 3.83 | 9.32 | 6.00 | 7.97 | 10.52 | 9.43 | 8.12 | 7.68 | 9.06 | 9.02 | 8.05 | 9.55 | 9.60 | 12.51 | 9.36 | 9.17 |
| **6800** | 7.36 | 8.13 | 8.25 | 3.49 | 10.75 | 7.89 | 11.05 | 12.99 | 10.51 | 11.20 | 9.23 | 11.25 | 9.11 | 7.77 | 9.45 | 9.13 | 9.38 | 8.84 | 10.37 |
| **6900** | 15.04 | 15.84 | 14.79 | 6.35 | 17.64 | 13.00 | 15.52 | 14.73 | 17.05 | 16.17 | 13.57 | 17.80 | 15.98 | 16.41 | 19.02 | 16.69 | 17.16 | 15.93 | 13.81 |
| **7000** | 11.81 | 16.68 | 12.48 | 5.14 | 17.24 | 9.04 | 16.89 | 14.85 | 14.67 | 12.87 | 11.36 | 12.42 | 14.14 | 12.29 | 15.61 | 13.52 | 13.35 | 13.63 | 11.98 |
| **7100** | 23.47 | 30.46 | 25.99 | 16.10 | 26.13 | 18.66 | 25.60 | 29.51 | 27.14 | 26.49 | 20.81 | 27.85 | 26.32 | 24.13 | 22.84 | 24.89 | 26.98 | 23.59 | 24.03 |
| **7200** | 35.20 | 41.85 | 35.33 | 25.46 | 33.83 | 29.43 | 33.42 | 38.91 | 36.50 | 35.25 | 29.48 | 36.14 | 35.27 | 31.85 | 31.76 | 32.88 | 34.50 | 31.18 | 30.49 |
| **7300** | 25.56 | 29.74 | 24.87 | 11.65 | 20.28 | 17.24 | 22.78 | 28.21 | 26.21 | 25.64 | 20.34 | 25.32 | 25.05 | 21.33 | 22.22 | 23.53 | 23.53 | 22.05 | 19.03 |
| **7400** | 32.84 | 35.52 | 32.04 | 19.45 | 28.54 | 24.26 | 31.38 | 32.72 | 30.03 | 29.28 | 24.66 | 32.94 | 33.11 | 29.24 | 31.50 | 30.28 | 31.41 | 30.16 | 28.01 |
| **7500** | 34.17 | 40.10 | 32.26 | 23.85 | 35.92 | 25.44 | 31.56 | 32.09 | 33.31 | 28.62 | 27.11 | 31.72 | 34.25 | 30.65 | 31.24 | 29.37 | 33.41 | 33.93 | 31.26 |
| **7600** | 32.37 | 42.50 | 31.68 | 19.23 | 30.56 | 19.82 | 28.43 | 31.82 | 32.27 | 30.33 | 29.22 | 32.09 | 32.25 | 30.97 | 30.89 | 30.93 | 31.72 | 32.23 | 29.23 |
| **7700** | 35.39 | 40.64 | 35.03 | 18.59 | 29.51 | 17.16 | 30.58 | 35.65 | 34.88 | 33.62 | 32.79 | 36.36 | 34.60 | 32.40 | 34.30 | 34.54 | 34.84 | 34.27 | 31.83 |
| **7800** | 10.81 | 13.61 | 11.01 | 2.29 | 11.46 | 6.02 | 13.22 | 13.91 | 13.80 | 9.23 | 11.61 | 11.11 | 12.69 | 10.87 | 11.44 | 14.78 | 14.45 | 13.67 | 8.43 |
| **7900** | 30.76 | 33.05 | 31.51 | 18.20 | 31.73 | 19.98 | 31.89 | 32.89 | 33.49 | 28.27 | 30.59 | 31.06 | 31.42 | 30.37 | 30.66 | 33.17 | 32.23 | 31.80 | 27.90 |
| **8000** | 18.63 | 23.15 | 21.82 | 8.54 | 24.76 | 16.04 | 18.69 | 19.78 | 21.94 | 15.46 | 18.51 | 17.32 | 18.85 | 15.56 | 17.54 | 20.20 | 19.39 | 18.04 | 14.95 |
| **8100** | 30.54 | 40.43 | 36.63 | 27.79 | 43.65 | 23.77 | 32.81 | 35.15 | 37.26 | 31.32 | 30.34 | 30.82 | 32.62 | 31.24 | 30.23 | 32.78 | 32.85 | 33.99 | 31.10 |
| **8200** | 12.82 | 31.30 | 31.75 | 22.74 | 29.85 | 2.10 | 10.85 | 17.03 | 24.18 | 11.26 | 10.97 | 11.17 | 12.54 | 10.29 | 10.33 | 11.92 | 13.12 | 14.56 | 16.09 |
| **8300** | 10.36 | 12.60 | 10.58 | 18.34 | 8.94 | 5.43 | 9.67 | 10.43 | 12.39 | 10.29 | 7.65 | 9.61 | 11.05 | 8.52 | 9.06 | 9.68 | 12.03 | 10.48 | 9.50 |
| **8400** | 8.87 | 8.15 | 10.48 | 38.11 | 6.47 | 6.68 | 8.78 | 6.56 | 8.79 | 8.79 | 7.42 | 9.20 | 9.80 | 7.16 | 6.44 | 9.37 | 8.34 | 10.22 | 7.96 |
| **8500** | 15.97 | 16.19 | 17.61 | 52.08 | 13.50 | 7.46 | 14.24 | 17.14 | 15.79 | 14.53 | 14.14 | 17.76 | 14.95 | 14.57 | 15.38 | 15.56 | 16.57 | 16.01 | 15.10 |
| **8600** | 15.97 | 16.19 | 17.61 | 52.08 | 13.50 | 7.46 | 14.24 | 17.14 | 15.79 | 14.53 | 14.14 | 17.76 | 14.95 | 14.57 | 15.38 | 15.56 | 16.57 | 16.01 | 15.10 |
| **8700** | 13.27 | 13.77 | 16.63 | 45.64 | 9.26 | 7.47 | 14.14 | 12.26 | 15.02 | 15.47 | 14.22 | 17.46 | 16.92 | 15.33 | 15.68 | 14.60 | 15.13 | 16.63 | 18.55 |
| **8800** | 33.19 | 33.57 | 32.41 | 66.97 | 30.29 | 27.42 | 30.75 | 31.84 | 32.87 | 32.72 | 29.95 | 34.30 | 32.96 | 32.56 | 32.20 | 32.73 | 31.57 | 32.50 | 31.98 |
| **8900** | 33.19 | 33.57 | 32.41 | 66.97 | 30.29 | 27.42 | 30.75 | 31.84 | 32.87 | 32.72 | 29.95 | 34.30 | 32.96 | 32.56 | 32.20 | 32.73 | 31.57 | 32.50 | 31.98 |
| **9000** | 27.05 | 26.64 | 25.32 | 60.06 | 24.18 | 21.89 | 24.58 | 25.45 | 26.31 | 27.23 | 24.24 | 27.32 | 26.34 | 26.90 | 26.25 | 26.97 | 25.37 | 25.43 | 26.63 |
| **9100** | 7.12 | 6.15 | 11.34 | 41.59 | 8.16 | 6.98 | 6.41 | 5.45 | 5.62 | 7.52 | 8.83 | 7.53 | 9.04 | 8.97 | 6.70 | 8.90 | 7.23 | 7.96 | 6.15 |
| **9200** | 18.43 | 18.66 | 30.66 | 54.21 | 20.03 | 14.39 | 20.28 | 21.06 | 18.18 | 17.64 | 19.29 | 23.05 | 21.70 | 19.49 | 19.14 | 20.27 | 20.96 | 22.78 | 22.23 |
| **9300** | 36.84 | 37.02 | 49.94 | 66.92 | 36.47 | 32.75 | 37.83 | 38.70 | 35.91 | 36.53 | 38.91 | 41.96 | 39.12 | 36.93 | 37.58 | 39.71 | 37.51 | 41.86 | 40.10 |
| **9400** | 21.78 | 23.27 | 32.73 | 45.00 | 21.24 | 19.94 | 24.26 | 23.13 | 20.47 | 21.43 | 21.94 | 23.00 | 24.10 | 22.72 | 22.03 | 24.95 | 21.97 | 25.49 | 24.30 |
| **9500** | 11.52 | 10.40 | 14.48 | 24.09 | 9.09 | 8.65 | 10.94 | 9.90 | 10.19 | 9.12 | 9.46 | 9.72 | 10.54 | 9.20 | 9.43 | 13.27 | 10.00 | 10.48 | 9.78 |
| **9600** | 8.70 | 9.64 | 9.93 | 17.82 | 8.23 | 6.34 | 8.28 | 8.99 | 8.64 | 7.68 | 7.55 | 10.14 | 8.96 | 8.18 | 9.18 | 8.51 | 7.28 | 8.84 | 8.79 |
| **9700** | 4.12 | 6.68 | 6.12 | 24.98 | 6.22 | 4.07 | 5.61 | 5.97 | 6.17 | 5.89 | 4.70 | 6.20 | 6.85 | 6.31 | 4.65 | 5.26 | 5.58 | 5.18 | 5.85 |
| **9800** | 10.85 | 11.47 | 10.37 | 45.36 | 12.30 | 8.92 | 26.60 | 13.11 | 11.97 | 9.90 | 12.46 | 22.62 | 12.96 | 12.34 | 11.09 | 11.92 | 10.52 | 10.60 | 10.32 |
| **9900** | 5.56 | 5.86 | 7.72 | 36.17 | 5.52 | 4.50 | 9.11 | 6.05 | 5.93 | 5.93 | 5.69 | 40.25 | 6.45 | 5.67 | 5.55 | 8.95 | 5.61 | 5.82 | 5.08 |
